# Supplementary material for: An Early Assessment of the Real-World Treatment Patterns of Type 2 Diabetes: A Comparison to the 2018 ADA/EASD Consensus Report Recommendations
Source: Springer Nature journal article supplement (doi:10.1007/s13300-022-01289-x), 2022-06-29
Supplement: MOESM1 [file 23219828]

**An Early Assessment of the Real-World Treatment Patterns of Type 2 Diabetes: A Comparison to the 2018 ADA/EASD Consensus Report Recommendations**

Jay P. Bae PhD, Zbigniew A. Kadziola MSc, Dongju Liu MSc, Chanadda Chinthammit PhD,  
Kristina S. Boye PhD, Kieren J. Mather MD

Eli Lilly and Company, Indianapolis, USA

**Corresponding author:**

Jay P. Bae

Eli Lilly and Company

Lilly Corporate Center

Indianapolis, IN 46285

Phone: +317-276-2000

Email: [bae\\_jay@lilly.com](mailto:bae_jay@lilly.com)

**Supplementary Table 1 – Codes used for ASCVD**

| <b>Diagnoses</b>              | <b>Codes Used</b>                                           |
|-------------------------------|-------------------------------------------------------------|
| Atherosclerosis               | ICD9: 440.xx; ICD10 I70                                     |
| Other IHD                     | ICD9: 411.xx; ICD10 I24                                     |
| Angina pectoris               | ICD9:413.xx; ICD10 I20                                      |
| Other chronic IHD             | ICD9:414.xx; ICD10 I25.1, I25.5, I25.6, I25.7, I25.8, I25.9 |
| Myocardial infarction (acute) | ICD9:410.xx; ICD10 I21., I22., I23                          |
| Ventricular fibrillation      | ICD9:427.1x, 427.3x; ICD10 I49.0                            |
| Atrial fibrillation           | ICD9:427.4x, 427.5x; ICD10 I48                              |
| Other ASCVD                   | ICD9:429.2x                                                 |
| Old myocardial infarction     | ICD9:412.xx; ICD10 I25.2                                    |
| Heart failure                 | ICD9:428.xx; ICD10 I50                                      |
| Atherosclerosis, severe       | ICD9:440.23, 440.24                                         |
| Aortic aneurysm/dissection    | ICD9:441.xx; ICD10 I71                                      |

Abbreviations: ASCVD, atherosclerotic cardiovascular disease; IHD, ischemic heart disease.

**Supplementary Table 2 – Explanatory variables selected for the multivariate logistic regression model**

| Variables Included in the Model                      |                                                       | Variables Not Selected by the Model                   |
|------------------------------------------------------|-------------------------------------------------------|-------------------------------------------------------|
| Clinical group: Obesity                              | Meglitinides (history)                                | Number of diabetes drug classes (current)             |
| Clinical group: Indicator of CKD                     | Sulfonylureas (history)                               | Number of diabetes drugs (current)                    |
| Clinical group: High risk or history of ASCVD        | Thiazolidinediones (history)                          | Myocardial infarction                                 |
| Clinical group: History of HF                        | Insulin (history)                                     | Congestive heart failure                              |
| Clinical group: Need to minimize hypoglycemia        | Number of diabetes drug classes (current)             | Peripheral vascular disease                           |
| Age                                                  | Number of diabetes drugs (current)                    | Cerebrovascular disease                               |
| CCI score                                            | Myocardial infarction                                 | Diabetes without chronic complications                |
| Years from onset of type 2 diabetes                  | Congestive heart failure                              | Diabetes with chronic complications                   |
| Gender                                               | Peripheral vascular disease                           | Renal disease                                         |
| Primary payer                                        | Cerebrovascular disease                               | Obesity (history and current)                         |
| Region                                               | Diabetes without chronic complications                | Obesity class (history and current)                   |
| Dementia                                             | Diabetes with chronic complications                   | Heart failure (history)                               |
| Chronic pulmonary disease                            | Renal disease                                         | Heart failure (current)                               |
| Rheumatic disease                                    | Obesity (history and current)                         | ASCVD (history)                                       |
| Peptic ulcer disease                                 | Obesity class (history and current)                   | ASCVD (current)                                       |
| Mild liver disease                                   | Heart failure (history)                               | CKD (history and current)                             |
| Hemiplegia or paraplegia                             | Heart failure (current)                               | Oral GLP-1 RA (history)                               |
| Any malignancy, including lymphoma and leukemia      | ASCVD (history)                                       | SGLT2 inhibitors (history)                            |
| Moderate or severe liver disease                     | ASCVD (current)                                       | GLP-1 RA (history)                                    |
| Metastatic solid tumor                               | CKD (history and current)                             | Oral GLP-1 RA (current)                               |
| AIDS or HIV                                          | Oral GLP-1 RA (history)                               | SGLT2 inhibitors (current)                            |
| Liver disease                                        | SGLT2 inhibitors (history)                            | GLP-1 RA (current)                                    |
| Stroke (history)                                     | GLP-1 RA (history)                                    | Category of number of diabetes drug classes (current) |
| Hypertension (history and current)                   | Oral GLP-1 RA (current)                               | Category of number of diabetes drugs (current)        |
| Atrial fibrillation or flutter (history and current) | SGLT2 inhibitors (current)                            | Severe Hypoglycemia (history)                         |
| Anemia (history and current)                         | GLP-1 RA (current)                                    |                                                       |
| NASH related liver disease (history and current)     | Category of number of diabetes drug classes (current) |                                                       |
| Amylin analogues (history)                           | Category of number of diabetes drugs (current)        |                                                       |
| Amylin Analogues (current)                           | Severe Hypoglycemia (history)                         |                                                       |
| Alpha-Glucosidase Inhibitors (history)               | Dyslipidemia (history and current)                    |                                                       |
| Biguanide (history)                                  | Hyperlipidemia                                        |                                                       |
| DPP-4 Inhibitors (history)                           | Lipids                                                |                                                       |
|                                                      | Weight loss medications FDA approved                  |                                                       |

Abbreviations: AIDS, acquired immunodeficiency syndrome; ASCVD, atherosclerotic cardiovascular disease; CCI, Charlson Comorbidity Index; CKD, chronic kidney disease; DPP-4, dipeptidyl peptidase-4; FDA, Food and Drug Administration; GLP-1 RA, glucagon-like peptide-1 receptor agonist; HF, heart failure; HIV, human immunodeficiency virus; NASH, non-alcoholic steatohepatitis; SGLT-2i, sodium-glucose co-transporter-2 inhibitor.

**Supplementary Table 3 – Use of GLP-1 RA and/or SGLT-2i in 2019 modelled by multivariate logistic regression: Commercial cohort results for the 5 clinical groups and for the most important (Wald Chi-square) 20 significant variables sorted by their decreasing importance**

| Variable           | Unit    | Odds Ratio | Wald Lower Confidence Limit for Odds Ratio | Wald Upper Confidence Limit for Odds Ratio | Wald Chi-square |
|--------------------|---------|------------|--------------------------------------------|--------------------------------------------|-----------------|
| OBESITY            |         | 1.251      | 1.231                                      | 1.272                                      | 709.4622        |
| HF                 |         | 0.817      | 0.783                                      | 0.853                                      | 107.1069        |
| ASCVD              |         | 0.968      | 0.945                                      | 0.992                                      | 107.1069        |
| CKD                |         | 0.744      | 0.721                                      | 0.769                                      | 323.0626        |
| HYPO               |         | 0.679      | 0.615                                      | 0.748                                      | 60.3179         |
| WT LOS MED         |         | 5.229      | 5.099                                      | 5.362                                      | 16548.3519      |
| DPP4 PAST          |         | 1.895      | 1.852                                      | 1.939                                      | 2950.1353       |
| AGE                | 10.0000 | 0.828      | 0.818                                      | 0.837                                      | 1104.4119       |
| REGION NORTH EAST  |         | 1.094      | 1.066                                      | 1.123                                      | 819.4631        |
| REGION SOUTH       |         | 1.248      | 1.223                                      | 1.274                                      | 819.4631        |
| REGION WEST        |         | 0.910      | 0.884                                      | 0.938                                      | 819.4631        |
| SU PAST            |         | 1.393      | 1.361                                      | 1.426                                      | 768.7819        |
| METFORMIN CURRENT  |         | 0.727      | 0.709                                      | 0.745                                      | 628.3028        |
| METFORMIN PAST     |         | 1.331      | 1.298                                      | 1.366                                      | 478.5694        |
| CCI SCORE          | 1.0000  | 1.086      | 1.078                                      | 1.095                                      | 435.2974        |
| STATIN             |         | 1.267      | 1.239                                      | 1.296                                      | 433.1141        |
| ICOSAPENT ETHYL    |         | 1.938      | 1.811                                      | 2.073                                      | 366.9845        |
| HI DEDUC HP vs PPO |         | 0.991      | 0.972                                      | 1.010                                      | 325.2977        |
| HMO vs PPO         |         | 0.802      | 0.783                                      | 0.822                                      | 325.2977        |
| ANEMIA             |         | 0.842      | 0.826                                      | 0.859                                      | 282.7470        |
| TUMOR              |         | 0.480      | 0.437                                      | 0.527                                      | 236.6111        |
| INSULIN PAST       |         | 1.236      | 1.197                                      | 1.275                                      | 173.2770        |
| MALIGNANCY         |         | 0.797      | 0.769                                      | 0.825                                      | 160.9854        |
| HYDRALZINE         |         | 0.675      | 0.635                                      | 0.718                                      | 157.8943        |
| FIBRATES           |         | 1.151      | 1.125                                      | 1.178                                      | 142.1196        |
| INSULIN CURRENT    |         | 1.189      | 1.152                                      | 1.226                                      | 118.3040        |
| DIURETICS          |         | 0.896      | 0.878                                      | 0.914                                      | 115.0806        |
| HYPERTENSION       |         | 1.141      | 1.113                                      | 1.170                                      | 105.9369        |

Included sample in the regression for the Commercial cohort (N=322,788). Abbreviations: ASCVD, atherosclerotic cardiovascular disease; CCI, Charlson Comorbidity Index; CKD, chronic kidney disease; DPP-4, dipeptidyl peptidase-4; HF, heart failure; HI DEDUC HP, High Deductible Health Plan; HMO, Health Maintenance Organization; HYPO, hypoglycemia; PPO, Preferred Provider Organization; SU, Sulfonylureas; WT LOS MED, weight loss medication.

**Supplementary Table 4 – Use of GLP-1 RA and/or SGLT-2i in 2019 modelled by multivariate logistic regression: Medicare cohort results for the 5 clinical groups and for the most important (Wald Chi-square) 20 significant variables sorted by their decreasing importance**

| Variable           | Unit    | Odds Ratio | Wald Lower Confidence Limit for Odds Ratio | Wald Upper Confidence Limit for Odds Ratio | Wald Chi-square |
|--------------------|---------|------------|--------------------------------------------|--------------------------------------------|-----------------|
| OBESITY            |         | 1.260      | 1.206                                      | 1.317                                      | 105.6937        |
| HF                 |         | 0.815      | 0.759                                      | 0.874                                      | 32.3281         |
| ASCVD              |         | 1.015      | 0.962                                      | 1.072                                      | 32.3281         |
| CKD                |         | 0.796      | 0.745                                      | 0.851                                      | 45.4018         |
| HYPO               |         | 0.653      | 0.545                                      | 0.783                                      | 21.2123         |
| WT LOS MED         |         | 11.447     | 10.701                                     | 12.245                                     | 5030.6946       |
| AGE                | 10.0000 | 0.479      | 0.461                                      | 0.497                                      | 1423.2464       |
| DPP4 PAST          |         | 1.973      | 1.860                                      | 2.092                                      | 511.7589        |
| REGION NORTH EAST  |         | 1.469      | 1.367                                      | 1.579                                      | 120.0192        |
| REGION SOUTH       |         | 1.232      | 1.148                                      | 1.321                                      | 120.0192        |
| REGION WEST        |         | 1.361      | 1.233                                      | 1.503                                      | 120.0192        |
| SU PAST            |         | 1.373      | 1.291                                      | 1.461                                      | 100.9033        |
| MALE               |         | 1.249      | 1.196                                      | 1.305                                      | 99.6948         |
| TZD PAST           |         | 1.317      | 1.225                                      | 1.415                                      | 56.3268         |
| ANEMIA             |         | 0.841      | 0.803                                      | 0.881                                      | 53.9432         |
| HI DEDUC HP vs PPO |         | 0.979      | 0.819                                      | 1.171                                      | 47.4733         |
| HMO vs PPO         |         | 0.796      | 0.746                                      | 0.850                                      | 47.4733         |
| ICOSAPENT ETHYL    |         | 1.764      | 1.493                                      | 2.085                                      | 44.3069         |
| INSULIN CURRENT    |         | 1.354      | 1.237                                      | 1.483                                      | 43.0071         |
| HYDRALZINE         |         | 0.701      | 0.628                                      | 0.783                                      | 39.5863         |
| DEMENTIA           |         | 0.682      | 0.602                                      | 0.774                                      | 35.6236         |
| METFORMIN PAST     |         | 1.228      | 1.143                                      | 1.318                                      | 31.8864         |
| T2D ONSET YEARS    | 1.0000  | 0.974      | 0.965                                      | 0.983                                      | 30.5746         |
| STATIN             |         | 1.228      | 1.139                                      | 1.323                                      | 28.7489         |
| METFORMIN CURRENT  |         | 0.855      | 0.805                                      | 0.909                                      | 25.2409         |
| MALIGNANCY         |         | 0.851      | 0.798                                      | 0.908                                      | 23.7839         |
| HEMI/PARAPLEGIA    |         | 0.668      | 0.567                                      | 0.786                                      | 23.4851         |
| CCI SCORE          | 1.0000  | 1.042      | 1.023                                      | 1.060                                      | 20.4760         |

Included sample in the regression for the Medicare cohort (N=70,456). Abbreviations: ASCVD, atherosclerotic cardiovascular disease; CCI, Charlson Comorbidity Index; CKD, chronic kidney disease; DPP-4, dipeptidyl peptidase-4; HF, heart failure; HI DEDUC HP, High Deductible Health Plan; HMO, Health Maintenance Organization; HYPO, hypoglycemia; PPO, Preferred Provider Organization; SU, Sulfonylureas; TZP, thiazolidinediones WT LOS MED, weight loss medication.
